# Supplementary material
Source: MDPI journal article supplement (https://www.mdpi.com/2072-4292/12/2/203)
Supplement: s1 [file s1]

# Description of AFM\_flightline\_database:

=====

This database contains the helicopter-borne electromagnetic (HEM) and radiometric (HRD) results along 26 flight-lines (L78.1 - L103.1) of an airborne survey conducted by BGR in 2004. The area covering the raised bog (Ahlen-Fahlkenber Moor, AFM) was truncated to X = 480000-492000, Y = 5945000-5954000 (ETRS89, UTM32N).

| Channel                             | Description                                                                  | Statistics (#: mean +- std) |                         |                         |
|-------------------------------------|------------------------------------------------------------------------------|-----------------------------|-------------------------|-------------------------|
| -----                               |                                                                              |                             |                         |                         |
| Airborne results along flightlines: |                                                                              |                             |                         |                         |
| -----                               |                                                                              |                             |                         |                         |
| X,Y                                 | Airborne coordinates along flightlines (ETRS89, UTM32N)                      |                             |                         |                         |
| RECORD                              | Record number                                                                |                             |                         |                         |
| TOPO                                | Airborne derived surface elevation (ref. DGM25)                              |                             |                         |                         |
| DEM                                 | Surface elevation at borehole derived from DGM25 (2012)                      |                             |                         |                         |
| TOPO_DEM                            | TOPO - DEM: all and [PI]                                                     | (62801:-0.03 +- 0.48 m)     | [28747:-0.10 +- 0.52 m] |                         |
| PI                                  | Peat indicator (bog area)                                                    |                             |                         |                         |
| RHOA5                               | Apparent resistivity at 140 kHz: all and [PI]                                | (62801: 71.9 +- 58.2 m)     | [28747:105.7 +- 52.5 m] |                         |
| DA5                                 | Apparent depth at 140 kHz: all and [PI]                                      | (62801:-1.30 +- 1.40 m)     | [28747:-1.68 +- 1.55 m] |                         |
| ZST5                                | Centroid depth at 140 kHz: all and [PI]                                      | (62801: 3.89 +- 1.99 m)     | [28747: 4.99 +- 1.45 m] |                         |
|                                     |                                                                              |                             |                         |                         |
| HEM results:                        |                                                                              |                             |                         |                         |
| -----                               |                                                                              |                             |                         |                         |
| SGE1                                | Elevation of upper steepest gradient derived from HEM inversion models (L20) |                             |                         |                         |
| SGE2                                | Elevation of lower steepest gradient derived from HEM inversion models (L20) |                             |                         |                         |
| SGE                                 | Selected peat base elevation (0.1 < RHO at SG < 130 Ohmm)                    |                             |                         |                         |
| SGEF                                | NL-flitered peat base elevation                                              |                             |                         |                         |
| Elev_PB                             | SGEF with respect to PI                                                      |                             |                         |                         |
| Elev_PB_Grid                        | Smoothed and interpolated Elev_PB                                            |                             |                         |                         |
| PBE_HEM                             | Final peat base elevation with respect to PI                                 | (28680:-0.86 +- 1.28 m)     |                         |                         |
| PT_HEM                              | Peat thickness: TOPO - PBE_HEM                                               | (28680: 3.27 +- 1.00 m)     |                         |                         |
| RHO_PB                              | Resistivity at Elev_PB                                                       | (19162:72.76 +-30.76 m)     |                         |                         |
| RHO_MIN                             | Minimum resistivity above Elev_PB                                            | (19162:38.81 +-19.26 m)     |                         |                         |
| RHO_MIN_LG                          | Log10(RHO_MIN)                                                               | (19162: 1.54 +- 0.22 m)     |                         |                         |
|                                     |                                                                              |                             |                         |                         |
| HRD results:                        |                                                                              |                             |                         |                         |
| -----                               |                                                                              |                             |                         |                         |
| Expo_TB                             | Exposure rate (from Technical Report)                                        |                             |                         |                         |
| Expo_BC                             | Exposure rate with advanced background and cultural noise corrections        |                             |                         |                         |
| Muea_HEM                            | -log(Expo_BC)/PT_HEM {geometr. mean} [opt]                                   | (28680: 0.31 +- 0.20 1/m)   | {28680: 0.26 1/m}       | [28680: 0.28 1/m]       |
| PT_E_HEM                            | -log(Expo_BC)/0.314 {0.257} [0.283]                                          | (28747: 2.94 +- 1.39 m)     | {28600: 3.59 +- 1.69 m} | [28600: 3.26 +- 1.54 m] |
| DPT_E_HEM                           | PT_E_HEM - PT_HEM {0.257} [0.283]                                            | (28600:-0.32 +- 1.68 m)     | {28548: 0.33 +- 1.94 m} | [28548: 0.00 +- 1.81 m] |
|                                     |                                                                              |                             |                         |                         |
| HEM+HRD results:                    |                                                                              |                             |                         |                         |
| -----                               |                                                                              |                             |                         |                         |
| CPT                                 | (PT_HEM + PT_E_HEM)/2 (if diff < 2 m)                                        | (28542: 3.24 +- 0.83 m)     |                         |                         |
| CPBE                                | TOPO - CPT                                                                   | (28542:-0.84 +- 1.06 m)     |                         |                         |
|                                     |                                                                              |                             |                         |                         |
| =====                               |                                                                              |                             |                         |                         |

=====

# Description of AFM\_borehole\_database

=====

This database contains borehole data (LBEG, 2007) as well as HEM and HRD results picked from lines next to or from grids at a borehole location.

| Channel | Description | Statistics (#: mean +- std) |
|---------|-------------|-----------------------------|
|---------|-------------|-----------------------------|

-----

## Boreholes:

-----

|          |                                               |                       |
|----------|-----------------------------------------------|-----------------------|
| X,Y_BH   | Borehole coordinates (ETRS89, UTM32N)         |                       |
| ID       | Borehole identifier                           |                       |
| BTOP     | Surface elevation of borehole (ref. 2007)     | (103: 2.60 +- 0.96 m) |
| BH_Depth | Peat depth found in boreholes (ref. 2007)     | (103: 2.94 +- 1.21 m) |
| BH_Elev  | BTOP - BH_Depth (ref. 2007)                   | (103:-0.34 +- 1.27 m) |
| DEM      | DEM (DGM25, ref. 2012) at borehole location   | (103: 2.58 +- 0.95 m) |
| BTOP_DEM | BTOP - DEM                                    | (103: 0.02 +- 0.08 m) |
| Depth_BH | BH_Depth - BTOP_DEM (ref. 2012)               | (103: 2.93 +- 1.20 m) |
| Elev_BH  | BH_Elev - BTOP_DEM (ref. 2012)                | (103:-0.37 +- 1.28 m) |
| Clay     | Clayey sediments below peat (1 = yes, * = no) |                       |

## Airborne results on line next to boreholes:

-----

|          |                                                        |                       |
|----------|--------------------------------------------------------|-----------------------|
| X,Y_AIR  | Airborne coordinates next to borehole (ETRS89, UTM32N) |                       |
| TOPO     | Airborne derived surface elevation (ref. DGM25)        | (103: 2.55 +- 0.94 m) |
| TOPO_DEM | TOPO - DEM                                             | (103:-0.03 +- 0.58 m) |
| DTOPO    | TOPO - BTOP                                            | (103:-0.05 +- 0.59 m) |
| LINE     | Line number next to borehole                           |                       |
| RECORD   | Record number next to borehole                         |                       |
| DIST     | Distance of borehole to next line (+/- = N/S)          |                       |

## HEM results on line next to boreholes:

-----

|      |                                                                          |                                             |
|------|--------------------------------------------------------------------------|---------------------------------------------|
| SG1  | Depth of upper steepest gradient derived from HEM inversion models (L20) |                                             |
| RHO1 | Resistivity at SG1 derived from HEM inversion models (L20)               |                                             |
| SG2  | Depth of lower steepest gradient derived from HEM inversion models (L20) |                                             |
| RHO2 | Resistivity at SG2 derived from HEM inversion models (L20)               |                                             |
| SG   | Selected steepest gradient (10 < RHO < 130 Ohmm)                         | ( 78: 3.28 +- 1.47 m)                       |
| DSG  | SG - BH_Depth [SG - Depth_BH]                                            | ( 78: 0.40 +- 1.79 m) [ 78: 0.42 +- 1.79 m] |
| SGE  | TOPO - SG [BTOP - SG]                                                    | ( 78:-0.83 +- 1.69 m) [ 78:-0.76 +- 1.66 m] |
| DSGE | SG - BH_Elev [SG - Elev_BH]                                              | ( 78:-0.47 +- 1.88 m) [ 78:-0.44 +- 1.87 m] |

## HEM results at boreholes (interpolated, picked from flightline grids):

-----

|           |                                              |                       |
|-----------|----------------------------------------------|-----------------------|
| PBE_Grid  | Gridded PBE_Grid ref. to peat indicator (PI) | ( 97:-0.57 +- 0.99 m) |
| DPBE_Grid | PBE_Grid - BH_Elev                           | ( 97:-0.17 +- 1.36 m) |
| DPBE_C    | DPBE_Grid for clay (CLAY = 1)                | ( 31: 0.16 +- 0.81 m) |
| DPBE_S    | DPBE_Grid for sand (CLAY = *)                | ( 66:-0.32 +- 1.53 m) |
| PT_HEM    | Peat thickness: TOPO - PBE_Grid              | ( 97: 3.18 +- 0.82 m) |
| DPT_HEM   | PT_HEM - BH_Depth                            | ( 97: 0.12 +- 1.39 m) |

HRD results at boreholes (interpolated, picked from flightline grids):

```
-----
Expo_TB      Exposure rate (from Technical Report)
Expo_BC      Exposure rate with advanced background and cultural noise corrections
Muea_BH      -log(Expo_BC)/BH_depth ( 95: 0.26 +- 0.16 1/m)
PT_E_BH      -log(Expo_BC)/0.26 (0.26: mean of Muea_BH) ( 97: 2.88 +- 1.61 m)
DPT_E_BH     PT_E_BH - BH_Depth ( 97:-0.18 +- 1.60 m)
Muea_EM      -log(Expo_BC)/PT_HEM at boreholes ( 97: 0.25 +- 0.18 1/m)
PT_E_EM      -log(Expo_BC)/0.25 (0.25: mean of Muea_EM) ( 97: 2.97 +- 1.67 m)
DPT_E_EM     PT_E_EM - PT_HEM ( 97:-0.21 +- 1.77 m)
PT_E_HEM     -log(Expo_BC)/0.28 (0.28: minimum DPT_E_HEM at lines) ( 97: 2.84 +- 1.31 m)
DPT_E_HEM    PT_E_HEM - BH_Depth ( 97:-0.22 +- 1.40 m)
```

HEM+HRD results at boreholes (interpolated, picked from flightline grids):

```
-----
CPT          (PT_HEM + PT_E_HEM)/2 (if diff < 2 m) ( 97: 3.01 +- 0.68 m)
DCPT         CPT_Grid - BH_Depth ( 97:-0.01 +- 1.13 m)
CPBE         TOPO - CPT_Grid ( 97:-0.45 +- 0.78 m)
DCPBE        CPBE_Grid - BH_Elev ( 97:-0.05 +- 1.14 m)
```
